# Supplementary material for: Phenylalanine-Based AMPA Receptor Antagonist as the Anticonvulsant Agent with Neuroprotective Activity—In Vitro and In Vivo Studies
Source: Molecules. 2022 Jan 27;27(3):875. doi: 10.3390/molecules27030875 (PMC8840081; doi:10.3390/molecules27030875)
Supplement: Supplementary file 1 [file molecules-27-00875-s001.zip › molecules-1535907-supplementary-done.pdf]

## Supporting Materials

# Phenylalanine-based AMPA receptor antagonist as the anticonvulsant agent with neuroprotective activity - *in vitro* and *in vivo* studies

Gniewomir Latacz <sup>1</sup>, Kinga Sałat <sup>2</sup>, Anna Furgała-Wojas <sup>2</sup>, Adrian Martyniak <sup>1</sup>, Agnieszka Olejarz-Maciej <sup>1</sup>, Ewelina Honkisz-Orzechowska <sup>1</sup> and Ewa Szymańska <sup>1,\*</sup>

<sup>1</sup> Department of Technology and Biotechnology of Drugs, Jagiellonian University Medical College, 9 Medyczna St., 30-688 Krakow, Poland

<sup>2</sup> Department of Pharmacodynamics, Faculty of Pharmacy, Jagiellonian University Medical College, 9 Medyczna St., 30-688 Krakow, Poland

\* Correspondence: ewa.szymanska@uj.edu.pl

Content:

Neuroprotection studies in SH-SY5Y against 100  $\mu$ M 6-OHDA.....2

Selected physicochemical and pharmacokinetic parameters predicted in silico for **1** and **8**.....3

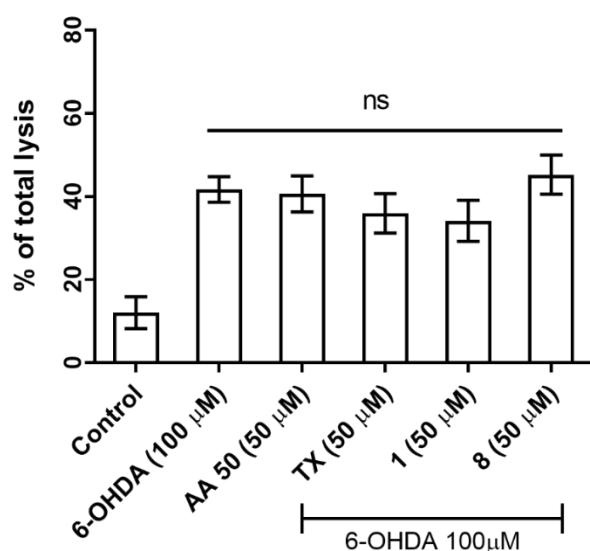

**Figure S1.** Neuroprotection studies of compounds **1** and **8** (50  $\mu$ M) against 6-OHDA (100  $\mu$ M) - induced LDH release from necrotic SH-SY5Y cells. Ascorbic acid (AA, 50  $\mu$ M) and Trolox (TX, 50  $\mu$ M) were used as the reference antioxidants. Statistical significance was evaluated by one-way ANOVA, followed by Bonferroni's comparison (ns – not significant, compared with 100  $\mu$ M of 6-OHDA).

**Table S1.** Selected physicochemical descriptors calculated by SwissADME calculator for individual enantiomers of compounds **1**, **8** as well as **levodopa** ((*S*)-3,4-dihydroxyphenylalanine)

| Symbol                 | Molecular weight<br>[g/mol] | Lipophilicity<br>LogP* | Solubility<br>LogS**  | TPSA*** [Å <sup>2</sup> ] |
|------------------------|-----------------------------|------------------------|-----------------------|---------------------------|
| ( <i>S</i> )- <b>1</b> | 352.73                      | 0.47                   | -2.65 (soluble)       | 149.60                    |
| ( <i>R</i> )- <b>1</b> | 352.73                      | 0.50                   | -2.65 (soluble)       | 149.60                    |
| ( <i>S</i> )- <b>8</b> | 306.74                      | 1.07                   | -1.66 (very soluble)  | 109.57                    |
| ( <i>R</i> )- <b>8</b> | 306.74                      | 1.06                   | -1.66 (very soluble)  | 109.57                    |
| Levodopa               | 197.19                      | -0.86                  | 1.11 (highly soluble) | 103.78                    |

\*Average of five methods implemented in SwissADME website; \*\*Topological method implemented from Ali J. et al, 2012, *J Chem Inf Model*, \*\*\* Topological Polar Surface Area, calculated from Ertl P. et al, 2000, *J Med Chem*.

**Table S2.** Selected pharmacokinetic descriptors calculated by SwissADME calculator for individual enantiomers of compounds **1**, **8** as well as **levodopa**

| Symbol                 | GI<br>absorption | BBB<br>permeant | P-gp<br>substrate | Inhibitor |         |        |        |        |
|------------------------|------------------|-----------------|-------------------|-----------|---------|--------|--------|--------|
|                        |                  |                 |                   | CYP1A2    | CYP2C19 | CYP2C9 | CYP2D6 | CYP3A4 |
| ( <i>S</i> )- <b>1</b> | low              | no              | no                | no        | no      | no     | no     | no     |
| ( <i>R</i> )- <b>1</b> | low              | no              | no                | no        | no      | no     | no     | no     |
| ( <i>S</i> )- <b>8</b> | high             | no              | no                | no        | no      | no     | no     | no     |
| ( <i>R</i> )- <b>8</b> | high             | no              | no                | no        | no      | no     | no     | no     |
| Levodopa               | high             | no              | no                | no        | no      | no     | no     | no     |
